# Supplementary material
Source: PubMed Central journal article supplement (PMC7358131)
Supplement: joces-133-243576-s1.pdf [file joces-133-243576-s1.pdf]

**Table S1.** Reagents/Resources used in this study.

| REAGENT OR RESOURCE                                          | SOURCE                               | IDENTIFIER                                                    |
|--------------------------------------------------------------|--------------------------------------|---------------------------------------------------------------|
| <b>Antibodies</b>                                            |                                      |                                                               |
| Guinea pig anti-dFz2C                                        | This study                           | N/A                                                           |
| Mouse monoclonal anti- $\beta$ -Tubulin                      | Developmental Studies Hybridoma Bank | DSHB Cat# E7, RRID:AB_528499                                  |
| Mouse monoclonal anti-Lamin B                                | Developmental Studies Hybridoma Bank | DSHB Cat# adl67.10, RRID:AB_528336                            |
| Mouse monoclonal anti-Actin                                  | MP Biomedicals                       | MP Bio Cat# 08691001, RRID:AB_2335127                         |
| Mouse monoclonal anti-Rho1                                   | Developmental Studies Hybridoma Bank | DSHB Cat# p1D9 (anti-rho1), RRID:AB_528263                    |
| Rabbit polyclonal anti-Arp3                                  | (Stevenson et al., 2002)             | N/A                                                           |
| Rabbit polyclonal anti-Arpc1                                 | (Stevenson et al., 2002)             | N/A                                                           |
| Rat anti-Cpa                                                 | (Amandio et al., 2014)               | N/A                                                           |
| Mouse monoclonal anti- mono and polyubiquitinated conjugates | Enzo Life Sciences                   | Enzo Life Sciences Cat# BML-PW8810, RRID:AB_10541840          |
| Mouse monoclonal anti-c-myc                                  | Developmental Studies Hybridoma Bank | DSHB Cat# 9E 10, RRID:AB_2266850                              |
| Mouse monoclonal anti-wash                                   | Developmental Studies Hybridoma Bank | DSHB Cat# Wash (P3H3), RRID:AB_2239540                        |
| Mouse polyclonal anti-CCDC53                                 | (Verboon et al., 2015)               | N/A                                                           |
| Mouse polyclonal anti-Strumpellin                            | (Verboon et al., 2015)               | N/A                                                           |
| Mouse polyclonal anti-FAM21                                  | (Verboon et al., 2015)               | N/A                                                           |
| Mouse monoclonal anti-Lamin C                                | Developmental Studies Hybridoma Bank | DSHB Cat# lc28.26, RRID:AB_528339                             |
| Rabbit polyclonal anti-Lamin B                               | (Stuurman et al., 1996)              | N/A                                                           |
| Mouse polyclonal anti-SWIP                                   | (Verboon et al., 2015)               | N/A                                                           |
| Mouse monoclonal anti-DLG                                    | Developmental Studies Hybridoma Bank | DSHB Cat# 4F3 anti-discs large, RRID:AB_528203                |
| Rabbit polyclonal anti-HRP                                   | Jackson ImmunoResearch Labs          | Jackson ImmunoResearch Labs Cat# 323-005-021, RRID:AB_2314648 |
| Mouse monoclonal anti-ATP5a                                  | Abcam                                | Abcam Cat# ab14748, RRID:AB_301447                            |
| Goat anti-Mouse Alexa Fluor 488                              | Invitrogen                           | Cat# A-11029, RRID:AB_138404                                  |
| Goat anti-Rabbit Alexa Fluor 568                             | Invitrogen                           | Cat# A-11036, RRID:AB_10563566                                |
| Goat anti-Guinea pig Alexa Fluor 568                         | Invitrogen                           | Cat# A-11075, RRID:AB_141954                                  |
| Peroxidase-AffiniPure Donkey anti-Mouse IgG (H+L)            | Jackson ImmunoResearch Labs          | Cat# 715-035-151, RRID:AB_2340771                             |
| Peroxidase-AffiniPure Donkey anti-Rabbit IgG (H+L)           | Jackson ImmunoResearch Labs          | Cat# 711-035-152, RRID:AB_10015282                            |
| Peroxidase-AffiniPure Donkey anti- Guinea pig IgG (H+L)      | Jackson ImmunoResearch Labs          | Jackson ImmunoResearch Labs Cat# 706-035-148, RRID:AB_2340447 |

|                                                               |                                     |                             |
|---------------------------------------------------------------|-------------------------------------|-----------------------------|
|                                                               |                                     |                             |
| <b>Bacterial Strains</b>                                      |                                     |                             |
| Escherichia coli – Rosetta-gami B(DE3)                        | Novagen                             | Cat#71137                   |
| <b>Chemicals and Recombinant Proteins</b>                     |                                     |                             |
| AlexaFluor-568-conjugated phalloidin                          | Thermo Scientific                   | Cat# A12380                 |
| SlowFade Gold                                                 | Thermo Scientific                   | Cat# S36937                 |
| SuperSignal™ West Pico PLUS Chemiluminescent Substrate        | Thermo Scientific                   | Cat# 34580                  |
| NativePaGE™ Sample Buffer (4x)                                | Invitrogen                          | Cat# BN2003                 |
| NativePaGE™ Cathode Buffer (20x)                              | Invitrogen                          | Cat# BN2002                 |
| NativePaGE™ Running Buffer (20x)                              | Invitrogen                          | Cat# BN2001                 |
| NativePAGE™ 3-12% Bis-Tris Protein Gels                       | Invitrogen                          | Cat# BN2011BX10             |
| Amersham™ Protran® Western blotting membranes, nitrocellulose | GE Healthcare Life Science          | Cat# 10600001               |
| Immobilon-P PVDF Membrane                                     | Millipore                           | Cat# IPVH00010              |
| Protein G Sepharose®, Fast Flow                               | Sigma-Aldrich                       | Cat# P3296-5ML              |
| Series 700 halocarbon oil                                     | Halocarbon Products Corp            | N/A                         |
| Trypan Blue Solution, 0.4%                                    | Thermo Scientific                   | Cat# 15250061               |
| Complete EDTA-free Protease Inhibitor cocktail                | Sigma-Aldrich                       | Cat# 11873580001            |
| <b>Commercial Assays</b>                                      |                                     |                             |
| Pierce™ BCA Protein Assay Kit                                 | Thermo Scientific                   | Cat# 23227                  |
| TnT® Quick Coupled Transcription/Translation System           | Promega                             | Cat# L1170                  |
| <b>Cell Lines</b>                                             |                                     |                             |
| Kc167 cell                                                    | Drosophila Genomics Resource Center | DGRC Cat# 1, RRID:CVCL_Z834 |
| <b>Organisms/Strains</b>                                      |                                     |                             |
| OregonR                                                       | Bloomington Drosophila Stock Center | BDSC_25211                  |
| P{Sgs3-GAL4.PD}                                               | Bloomington Drosophila Stock Center | BDSC_6870                   |
| P{w[+mC]=Mhc-GAL4.K}2                                         | Bloomington Drosophila Stock Center | BDSC_55133                  |
| P{w[+mW.hs]=GawB}BG487                                        | Bloomington Drosophila Stock Center | BDSC_51634                  |
| wash <sup>Δ185hz(outX)</sup>                                  | (Verboon et al., 2018)              | N/A                         |
| P{TRiP.HMC05339}attP40 (Wash RNAi)                            | Bloomington Drosophila Stock Center | BDSC_62866                  |
| 7429R-1 (CCDC53 <sup>RNAi(1)</sup> )                          | NIG-FLY                             | N/A                         |
| 7429R-6 (CCDC53 <sup>RNAi(2)</sup> )                          | NIG-FLY                             | N/A                         |
| P{TRiP-HMJ22674}attP40 (Strumpellin <sup>RNAi(1)</sup> )      | Bloomington Drosophila Stock Center | BDSC_51906                  |
| P{KK101498}VIE-260B (Strumpellin <sup>RNAi(2)</sup> )         | Vienna Drosophila Resource Center   | FlyBase_FBst0472431         |
| P{GD7643}y31840 (SWIP <sup>RNAi(1)</sup> )                    | Vienna Drosophila Resource Center   | FlyBase_FBst0459246         |

|                                                                    |                                     |                     |
|--------------------------------------------------------------------|-------------------------------------|---------------------|
| P{KK101329}VIE-260B (SWIP <sup>RNAi(2)</sup> )                     | Vienna Drosophila Resource Center   | FlyBase_FBst0476085 |
| 16742R-3 (FAM21 <sup>RNAi(1)</sup> )                               | NIG-FLY                             | N/A                 |
| 16742R-2 (FAM21 <sup>RNAi(2)</sup> )                               | NIG-FLY                             | N/A                 |
| P{TRiP-HMC04816}attP40 (LaminB RNAi)                               | Bloomington Drosophila Stock Center | BDSC_57501          |
| P{TRiP-HMJ21357}attP40 (Arp3 RNAi)                                 | Bloomington Drosophila Stock Center | BDSC_53972          |
| P{KK108277}VIE-260B (Arpc1 RNAi)                                   | Vienna Drosophila Resource Center   | FlyBase_FBst0480998 |
| P{TRiP-HMJ22674}attP40 (CpA <sup>RNAi</sup> )                      | Bloomington Drosophila Stock Center | BDSC_41952          |
| P{TRiP-GLC01716}attP40 (CpB <sup>RNAi</sup> )                      | Bloomington Drosophila Stock Center | BDSC_50594          |
| P{w <sup>+</sup> ; GFP-Wash <sup>WT</sup> }                        | This study                          | N/A                 |
| P{w <sup>+</sup> ; GFP-Wash <sup>ΔSHRC</sup> }                     | This study                          | N/A                 |
| P{w <sup>+</sup> ; GFP-Wash <sup>ΔΔLamB</sup> }                    | This study                          | N/A                 |
| P{w <sup>+</sup> ; GFP-Wash <sup>ΔArp2/3</sup> }                   | This study                          | N/A                 |
| <b>Oligonucleotides</b>                                            |                                     |                     |
| Wash-F:<br>CTCTGGTACCGTGTCGCTTCTTGCAGTG                            | This study                          | N/A                 |
| Wash-R:<br>CTCTGGATCCCAAACGTGCCTCCTTCTC                            | This study                          | N/A                 |
| ΔΔLamin-F1:<br>CTCGTTGCCTCCGCGGGCGGCCATCGCCATCGC<br>TGCACCCGCCCGC  | This study                          | N/A                 |
| ΔΔLamin-R1:<br>GCGGGCGGGTGCAGCGATGGCGATGGCCGCC<br>GCGGAGGCAACGAG   | This study                          | N/A                 |
| ΔΔLamin-F2:<br>GGAATTTCTGGAGCGCGGCTCCCGTCGCCGC<br>CGCTGCTGGCAATCCC | This study                          | N/A                 |
| ΔΔLamin-R2:<br>GGGATTGCCAGCAGCGGCGGCGACGGGAGCC<br>GCGCTCCAGAAATTCC | This study                          | N/A                 |
| ΔArp2/3-F:<br>GACGAGGATGGGTGCAACTAGTGAATA                          | This study                          | N/A                 |
| ΔArp2/3-R:<br>TATTCAGTAGTTCGACCCATCCTCGTC                          | This study                          | N/A                 |
| ΔSHRC-F:<br>CAAAGGTTGAGGACGCAGCCGCTGCTGTGAAG<br>CGCGCT             | This study                          | N/A                 |
| ΔSHRC-F:<br>AGCGCGCTTCACAGCAGCGGCTGCGTCTCAA<br>CCTTTG              | This study                          | N/A                 |
| ΔKRAQ-F:<br>TAAACAATCGTGTGGCGGCCGCTGCGGCAAAA<br>ATCGAT             | This study                          | N/A                 |
| ΔKRAQ-R:<br>ATCGATTTTTGCCGACGCGGCCGCCACACGATT<br>GTTTA             | This study                          | N/A                 |
| dFz2c-F:<br>TGTCGGATCCTGATGTGGCGACGCTTCTGGCG<br>GAG                | This study                          | N/A                 |

|                                                   |                           |                                                                     |
|---------------------------------------------------|---------------------------|---------------------------------------------------------------------|
| dFz2c-R:<br>GACAGCGGCCGCTCATACGTGGCTGGCCGCCG<br>G | This study                | N/A                                                                 |
| <b>Recombinant DNA</b>                            |                           |                                                                     |
| pGEX-dt                                           | (Liu et al., 2009)        |                                                                     |
| pGEX-dt-dFz2C                                     | This study                |                                                                     |
| <b>Software and Algorithms</b>                    |                           |                                                                     |
| Fiji                                              | (Schindelin et al., 2012) | <a href="http://fiji.sc/">http://fiji.sc/</a>                       |
| R                                                 | R Core Team, 2017         | <a href="https://www.r-project.org/">https://www.r-project.org/</a> |
| <b>Other</b>                                      |                           |                                                                     |
| LSM 780 confocal microscope with Airyscan         | Zeiss                     | N/A                                                                 |
| JEM-1230 transmission electron microscope         | JEOL                      | N/A                                                                 |
| Revolution WD spinning disk confocal microscope   | Andor                     | N/A                                                                 |

#### **References Cited:**

Amandio, A.R., Gaspar, P., Whited, J.L., and Janody, F. (2014). Subunits of the *Drosophila* actin-capping protein heterodimer regulate each other at multiple levels. *PloS one* 9, e96326.

Liu, R., Abreu-Blanco, M.T., Barry, K.C., Linardopoulou, E.V., Osborn, G.E., and Parkhurst, S.M. (2009). Wash functions downstream of Rho and links linear and branched actin nucleation factors. *Development* 136, 2849-2860.

Schindelin, J., Arganda-Carreras, I., Frise, E., Kaynig, V., Longair, M., Pietzsch, T., Preibisch, S., Rueden, C., Saalfeld, S., Schmid, B., *et al.* (2012). Fiji: an open-source platform for biological-image analysis. *Nature methods* 9, 676-682.

Stevenson, V., Hudson, A., Cooley, L., and Theurkauf, W.E. (2002). Arp2/3-dependent pseudocleavage [correction of psuedocleavage] furrow assembly in syncytial *Drosophila* embryos. *Current biology : CB* 12, 705-711.

Stuurman, N., Sasse, B., and Fisher, P.A. (1996). Intermediate filament protein polymerization: molecular analysis of *Drosophila* nuclear lamin head-to-tail binding. *J Struct Biol* 117, 1-15.

Verboon, J.M., Decker, J.R., Nakamura, M., and Parkhurst, S.M. (2018). Wash exhibits context-dependent phenotypes and, along with the WASH regulatory complex, regulates *Drosophila* oogenesis. *Journal of cell science* 131.

Verboon, J.M., Rahe, T.K., Rodriguez-Mesa, E., and Parkhurst, S.M. (2015). Wash functions downstream of Rho1 GTPase in a subset of *Drosophila* immune cell developmental migrations. *Molecular biology of the cell* 26, 1665-1674.



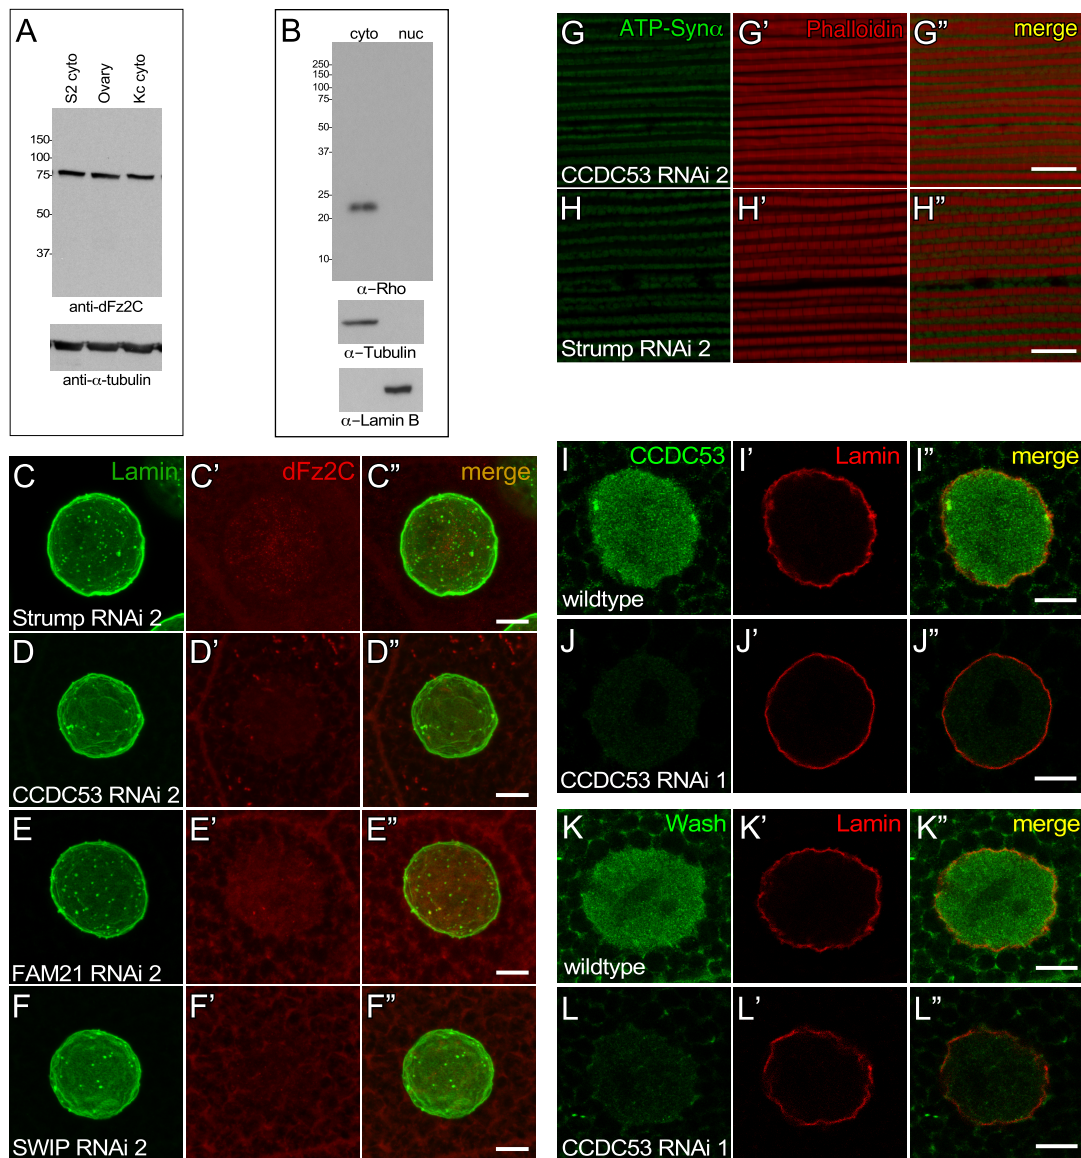

**Fig. S1. dFz2C antibody specificity and SHRC mutant characterization.** (A) Western blot of S2 cell cytoplasmic, ovary whole cell, and Kc cell cytoplasmic extracts probed with antibodies to dFz2C to show antibody specificity. Loading control is  $\alpha$ -Tubulin. (B) Western blot of Kc cell cytoplasmic and nuclear extracts probed with antibodies to Rho1. Blots probed with antibodies to Tubulin and Lamin show cytoplasmic and nuclear purity of extracts. (C-F'') Confocal micrograph projections of CCDC53 RNAi 2 (C-C''), Strumpellin RNAi 2 (D-D''), SWIP RNAi 2 (E-E''), and FAM21 RNAi 2 (F-F'') larval salivary gland nuclei stained with Lamin B and dFz2C. (G-H'') Confocal micrograph projections of adult IFM from CCDC53 RNAi 2 (G-G'') and Strumpellin RNAi 2 (H-H'') flies aged 21 days then stained with the activity dependent mitochondrial marker ATP-Syn- $\alpha$  and Phalloidin. (I-L'') Single slice confocal micrograph from wildtype (I-I'', K-K'') and CCDC53 RNAi 1 (J-J'', L-L'') larval salivary gland nuclei co-stained with antibodies to CCDC53 and Lamin B (I-I'') or Wash and Lamin B (K-K''). Note that CCDC53 RNAi leads to loss of Wash expression (L-L''). Scale bars: 5  $\mu$ m in C-F'', I-L''; 10  $\mu$ m in G-H''.

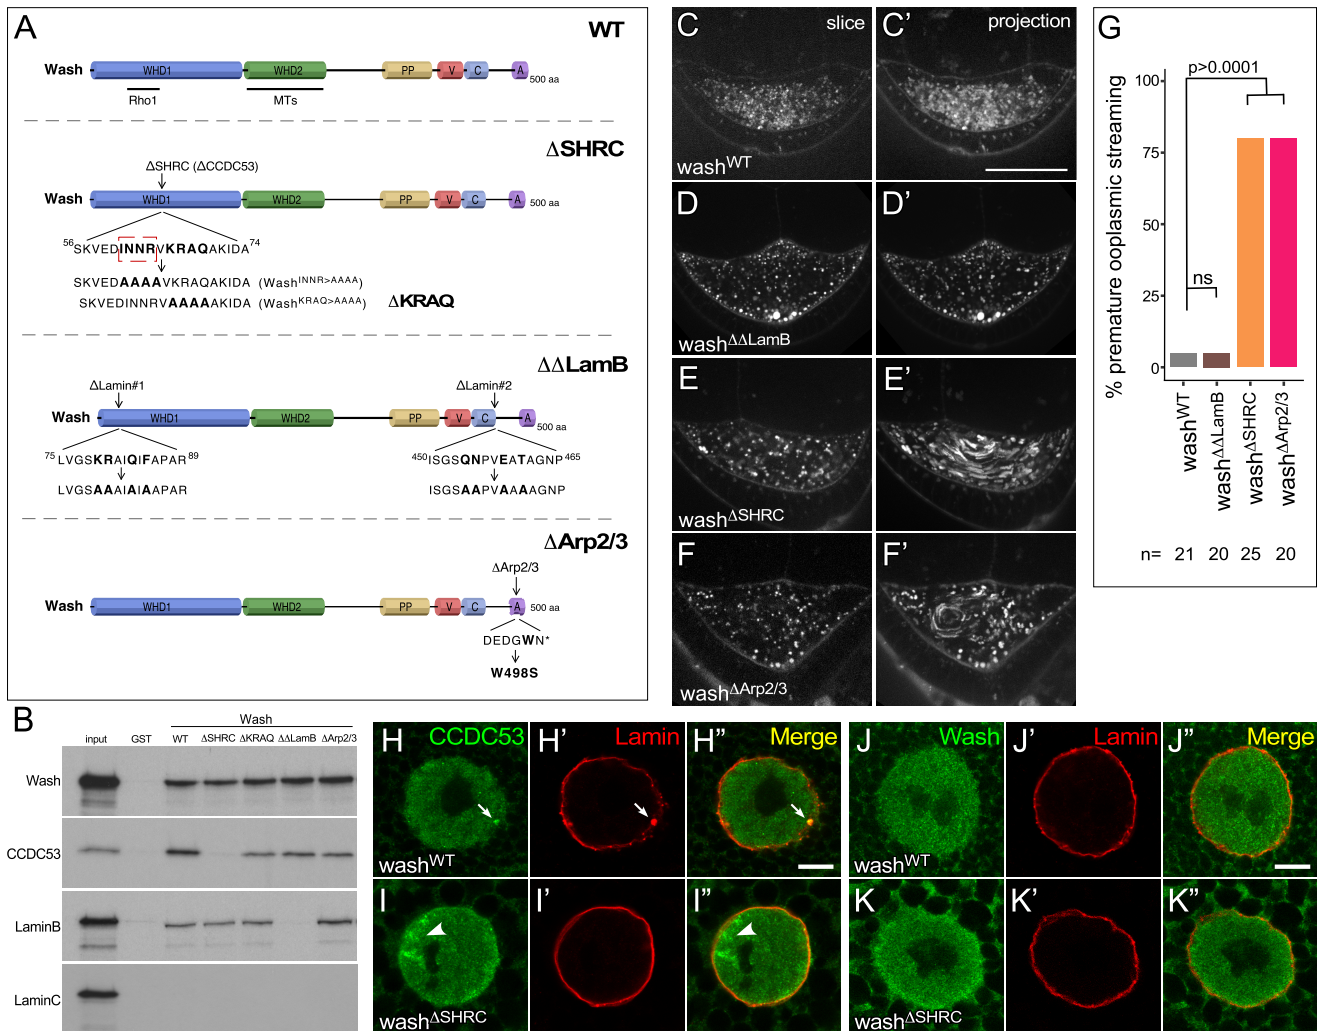

**Fig. S2. Wash point mutant characterization.** (A) Schematic diagram of the Wash wildtype (WT) rescue and point/substitution mutation constructs used to generate the transgenic lines indicating the position and specific substitution mutations for each construct (not drawn to scale). (B) GST pull-down experiments demonstrating the regions of Wash required for binding to Wash, CCDC53 and Lamin B, as well as the lack of direct binding of Wash by Lamin C. <sup>35</sup>S-labeled *in vitro* translated Wash, CCDC53, Lamin B and Lamin C were tested with bacterially purified GST Wash (wildtype or point mutation containing) proteins as indicated. 10% input is shown. (C-F') Single time-point (C-F) and 30 time-point projections (C'-F') of live time-lapse movies of stage 7 oocytes in *wash*<sup>WT</sup> (C-C'), *wash* $\Delta\Delta$ LamB (D-D'), *wash* $\Delta$ SHRC (E-E'), and *wash* $\Delta$ Arp2/3 (F-F'). (G) Quantification of the percentage of stage 7 oocytes exhibiting premature ooplasmic streaming (N= for each genotype indicated on graph). Two-tailed Fishers exact test; p-values indicated. (H-K'') Single slice confocal micrograph from *wash*<sup>WT</sup> (H-H',J-J'') and *wash* $\Delta$ SHRC (I-I'', K-K'') larval salivary gland nucleus co-stained with antibodies to CCDC53 and Lamin B (H-I'') or Wash and Lamin B (J-K''). Note CCDC53 enrichment at the nuclear periphery coincident with NE-bud sites (arrow; H-H'') that is not observed in *wash* $\Delta$ SHRC mutants (I-I''). Scale bars: 50 $\mu$ m in C-F'; 5 $\mu$ m in H-K''.
